# Supplementary material for: Genetic Etiology of Parkinson Disease Associated with Mutations in the SNCA, PARK2, PINK1, PARK7, and LRRK2 Genes: A Mutation Update
Source: PubMed Central journal article supplement (PMC3056147; doi:10.1002/humu.21277), 2010-05-18
Supplement: humu0031-0763-SD1.pdf [file humu0031-0763-SD1.pdf]

**Supp. Table S1-1. SNCA Classic mutations** <sup>(a)</sup>

| (a) Missense, nonsense and frameshift mutations |              |                |                   |              |                               |
|-------------------------------------------------|--------------|----------------|-------------------|--------------|-------------------------------|
| Region                                          | NG Numbering | cDNA Numbering | Protein Numbering | dbSNP number | Reference                     |
| EX2                                             | g.07717G>C   | c.88G>C        | p.A30P            | -            | [Kruger et al., 1998]         |
| EX3                                             | g.15127G>A   | c.136G>A       | p.E46K            | -            | [Zarranz et al., 2004]        |
| EX3                                             | g.15148G>A   | c.157G>A       | p.A53T            | -            | [Polymeropoulos et al., 1997] |
| (b) Splice, silent and UTR variants             |              |                |                   |              |                               |
| Region                                          | NG Numbering | cDNA Numbering | Alias             | dbSNP number | Reference                     |
| IVS2                                            | g.07759A>C   | -              | IVS2+9A>C†        | -            | [Nuytemans et al., 2009]      |
| EX3                                             | g.15138G>A   | c.193G>A       | p.V49             | -            | [Nuytemans et al., 2009]      |
| EX6                                             | g.116654C>T  | c.454C>T       | p.Y136            | -            | [Nuytemans et al., 2009]      |
| 3'UTR                                           | g.117170C>T  | c.*501C>T      | Ex6+534C>T        | rs17016074   | [Mueller et al., 2005]        |
| 3'UTR                                           | g.117562C>T  | c.*893C>T      | Ex6+926C>T        | rs356165     | [Pals et al., 2004a]          |

**Supp. Table S1-2. SNCA Copy number variations** <sup>(a)</sup>

| Region        | cDNA Numbering        | Alias    | Mutation Description                                                                                                                                                                                                                                                      | Reference                                  |
|---------------|-----------------------|----------|---------------------------------------------------------------------------------------------------------------------------------------------------------------------------------------------------------------------------------------------------------------------------|--------------------------------------------|
| Complete gene | c.(?_70)_(*2533_?)[3] | tripSNCA | Chromosome 4q genomic triplication of unknown size containing <i>SNCA</i> and including <i>HERC5</i> , <i>PIGY</i> , <i>HERC3</i> , <i>NAPIL5</i> , <i>FAM13A0S</i> , <i>AX748242</i> , <i>FAM13A1</i> , <i>KIAA0914</i> , <i>TIGD2</i> , <i>AK026379</i> , <i>GPRIN3</i> | [Singleton et al., 2003]                   |
| Complete gene | c.(?_70)_(*2533_?)[3] | tripSNCA | Chromosome 4q genomic triplication of unknown size containing <i>SNCA</i> and including <i>CR05611</i> , <i>AK123890</i> , <i>MMRN1</i> , <i>MGC48628</i> and <i>KIAA1680</i>                                                                                             | [Farrer et al., 2004]                      |
| Complete gene | c.(?_70)_(*2533_?)[3] | tripSNCA | Chromosome 4q genomic triplication of unknown size containing <i>SNCA</i> and including <i>AK026379</i> , <i>GPRIN3</i> , <i>CR05611</i> , <i>AK123890</i> , <i>MMRN1</i> , <i>MGC48628</i> , <i>KIAA1680</i> and <i>TMSL3</i>                                            | [Ibanez et al., 2009]                      |
| Complete gene | c.(?_70)_(*2533_?)dup | dupSNCA  | Chromosome 4q genomic duplication of unknown size containing <i>SNCA</i> and including <i>CR05611</i> , <i>AK123890</i> , <i>MMRN1</i> , <i>MGC48628</i> and <i>KIAA1680</i>                                                                                              | [Fuchs et al., 2007]                       |
| Complete gene | c.(?_70)_(*2533_?)dup | dupSNCA  | Chromosome 4q genomic duplication of unknown size containing <i>SNCA</i> and including at least <i>FAM13A1</i> , <i>KIAA0914</i> , <i>TIGD2</i> , <i>AK026379</i> , <i>GPRIN3</i> and <i>CR05611</i>                                                                      | [Chartier-Harlin et al., 2004]             |
| Complete gene | c.(?_70)_(*2533_?)dup | dupSNCA  | Chromosome 4q genomic duplication of unknown size containing <i>SNCA</i> and including at least <i>CR05611</i> and <i>AK123890</i>                                                                                                                                        | [Ibanez et al., 2004]                      |
| Complete gene | c.(?_70)_(*2533_?)dup | dupSNCA  | Chromosome 4q genomic duplication of unknown size containing <i>SNCA</i> and including at least <i>CR05611</i> , <i>AK123890</i> and <i>MMRN1</i>                                                                                                                         | [Ibanez et al., 2004]                      |
| Complete gene | c.(?_70)_(*2533_?)dup | dupSNCA  | Chromosome 4q genomic duplication of unknown size containing <i>SNCA</i> and including <i>CR05611</i> , <i>AK123890</i> and <i>MMRN1</i>                                                                                                                                  | [Nishioka et al., 2006]                    |
| Complete gene | c.(?_70)_(*2533_?)dup | dupSNCA  | Chromosome 4q genomic duplication of unknown size containing <i>SNCA</i> and including at least <i>CR05611</i> , <i>AK123890</i> , <i>MMRN1</i> , <i>MGC48628</i> and <i>KIAA1680</i>                                                                                     | [Nishioka et al., 2006]                    |
| Complete gene | c.(?_70)_(*2533_?)dup | dupSNCA  | Chromosome 4q genomic duplication of unknown size containing at least <i>SNCA</i>                                                                                                                                                                                         | [Ahn et al., 2008; Nuytemans et al., 2009] |
| Complete gene | c.(?_70)_(*2533_?)dup | dupSNCA  | Chromosome 4q genomic duplication of unknown size containing <i>SNCA</i> and including 32 more known or predicted genes                                                                                                                                                   | [Ikeuchi et al., 2008]                     |
| Complete gene | c.(?_70)_(*2533_?)dup | dupSNCA  | Chromosome 4q genomic duplication of unknown size containing <i>SNCA</i> and including 44 more known or predicted genes                                                                                                                                                   | [Ibanez et al., 2009]                      |
| Complete gene | c.(?_70)_(*2533_?)dup | dupSNCA  | Chromosome 4q genomic duplication of unknown size containing <i>SNCA</i> and including 34 more known or predicted genes                                                                                                                                                   | [Ibanez et al., 2009]                      |

| Region        | cDNA Numbering        | Alias   | Mutation Description                                                                                                                                                         | Reference             |
|---------------|-----------------------|---------|------------------------------------------------------------------------------------------------------------------------------------------------------------------------------|-----------------------|
| Complete gene | c.(?_-70)(*2533_?)dup | dupSNCA | Chromosome 4q genomic duplication of unknown size containing <i>SNCA</i> and including <i>CR05611</i> , <i>AK123890</i> , <i>MMRN1</i> , <i>MGC48628</i> and <i>KIAA1680</i> | [Ibanez et al., 2009] |
| Complete gene | c.(?_-70)(*2533_?)dup | dupSNCA | Chromosome 4q genomic duplication of unknown size containing <i>SNCA</i> and including <i>CR05611</i> and <i>AK123890</i>                                                    | [Ibanez et al., 2009] |

For all references please visit the Parkinson Disease mutation database PDmutDB (<http://www.molgen.ua.ac.be/PDmutDB>).

<sup>(a)</sup> NG numbering: NG\_011851.1; cDNA numbering: NM\_001146055.1; protein numbering: NP\_000336.1. Nucleotide numbering reflects cDNA numbering with +1 corresponding to the A of the ATG translation initiation codon in the reference sequence, according to journal guidelines ([www.hgvs.org/mutnomen](http://www.hgvs.org/mutnomen)). The initiation codon is codon 1.

† Also observed in control individuals

**Supp. Table S2. *LRRK2* Classic mutations<sup>(a)</sup>**

| (a) Missense, nonsense and frameshift mutations |              |                |                   |              |                             |
|-------------------------------------------------|--------------|----------------|-------------------|--------------|-----------------------------|
| Region                                          | NG numbering | cDNA Numbering | Protein Numbering | dbSNP number | Reference                   |
| EX1                                             | g.5149G>A    | c.28G>A        | p.E10K            | -            | [Nichols et al., 2007]      |
| EX2                                             | g.5548C>T    | c.155C>T       | p.S52F§           | rs72546335   | [Lesage et al., 2009]       |
| EX4                                             | g.15624T>C   | c.356T>C       | p.L119P           | rs33995463   | [Zimprich et al., 2004a]    |
| EX6                                             | g.20533C>T   | c.632C>T       | p.A211V†          | -            | [Xiomerisiou et al., 2007]  |
| EX6                                             | g.20584G>C   | c.647G>C       | p.C228S*          | rs56108242   | [Paisan-Ruiz et al., 2008]  |
| EX9                                             | g.31263G>A   | c.1000G>A      | p.E334K           | -            | [Nichols et al., 2007]      |
| EX9                                             | g.31351A>G   | c.1088A>G      | p.N363S           | rs72546336   | [Lesage et al., 2009]       |
| EX9                                             | g.31359G>A   | c.1096G>A      | p.V366M§          | -            | [Nuytemans et al., 2009]    |
| EX11                                            | g.32974C>T   | c.1256C>T      | p.A419V           | rs34594498   | [Di Fonzo et al., 2006b]    |
| EX13                                            | g.39568G>A   | c.1517G>A      | p.R506Q           | -            | [Nuytemans et al., 2009]    |
| EX14                                            | g.43865A>G   | c.1630A>G      | p.K544E           | -            | [Xiomerisiou et al., 2007]  |
| EX14                                            | g.43888C>G   | c.1653C>G      | p.N551K           | rs7308720    | [Mata et al., 2005b]        |
| EX18                                            | g.58157C>T   | c.2147C>T      | p.A716V*          | -            | [Paisan-Ruiz et al., 2008]  |
| EX18                                            | g.58144A>G   | c.2134A>G      | p.M712V           | -            | [Paisan-Ruiz et al., 2008]  |
| EX18                                            | g.58177A>G   | c.2167A>G      | p.I723V           | rs10878307   | [Mata et al., 2005b]        |
| EX19                                            | g.63887C>T   | c.2264C>T      | p.P755L           | rs34410987   | [Di Fonzo et al., 2006b]    |
| EX19                                            | g.64001G>T   | c.2378G>T      | p.R793M†          | rs35173587   | [Zimprich et al., 2004a]    |
| EX19                                            | g.64051A>G   | c.2428A>G      | p.I810V           | rs72546337   | [Lesage et al., 2009]       |
| EX20                                            | g.67451A>G   | c.2611A>G      | p.K871E*          | -            | [Paisan-Ruiz et al., 2008]  |
| EX21                                            | g.73614G>x   | c.2769G>x      | p.Q923H           | rs58559150   | [Camargos et al., 2009]     |
| EX21                                            | g.73634A>G   | c.2789A>G      | p.Q930R           | -            | [Berg et al., 2005]         |
| EX25                                            | g.75456G>A   | c.2918G>A      | p.S973N           | -            | [Haubenberger et al., 2007] |
| EX23                                            | g.75556A>G   | c.3018A>G      | p.I1006M          | -            | [Nuytemans et al., 2009]    |
| EX24                                            | g.78336G>A   | c.3200G>A      | p.R1067Q†         | -            | [Skipper et al., 2005]      |
| EX24                                            | g.78423C>G   | c.3287C>G      | p.S1096C          | -            | [Berg et al., 2005]         |
| EX24                                            | g.78469G>T   | c.3333G>T      | p.Q1111H          | -            | [Nichols et al., 2007]      |
| EX25                                            | g.79115A>G   | c.3364A>G      | p.I1122V          | rs34805604   | [Zimprich et al., 2004a]    |
| EX25                                            | g.79202G>A   | c.3451G>A      | p.A1151T          | -            | [Schlitter et al., 2006]    |
| EX25                                            | g.79245T>C   | c.3494T>C      | p.L1165P          | -            | [Chen-Plotkin et al., 2008] |
| EX26                                            | g.82856A>G   | c.3574A>G      | p.I1192V          | -            | [Nichols et al., 2007]      |
| EX27                                            | g.83994A>G   | c.3647A>G      | p.H1216R          | rs72546324   | [Lesage et al., 2009]       |
| EX27                                            | g.84030G>C   | c.3683G>C      | p.S1228T          | rs60185966   | [Berg et al., 2005]         |
| EX28                                            | g.85781C>G   | c.3784C>G      | p.P1262A*,§       | rs4640000    | [Paisan-Ruiz et al., 2008]  |

|      |             |           |           |            |                            |
|------|-------------|-----------|-----------|------------|----------------------------|
| EX29 | g.88471G>A  | c.3974G>A | p.R1325Q  | rs72546338 | [Nuytemans et al., 2008]   |
| EX29 | g.88608A>G  | c.4111A>G | p.I1371V  | rs17466213 | [Paisan-Ruiz et al., 2005] |
| EX30 | g.89099G>A  | c.4193G>A | p.R1398H  | rs7133914  | [Paisan-Ruiz et al., 2005] |
| EX30 | g.89135C>T  | c.4229C>T | p.T1410M  | rs72546327 | [Lesage et al., 2009]      |
| EX30 | g.89164G>A  | c.4258GA  | p.D1420N  | -          | [Gao et al., 2009]         |
| EX31 | g.90424C>G  | c.4321C>G | p.R1441G  | -          | [Paisan-Ruiz et al., 2004] |
| EX31 | g.90424C>T  | c.4321C>T | p.R1441C  | rs33939927 | [Zimprich et al., 2004a]   |
| EX31 | g.90425G>A  | c.4322G>A | p.R1441H  | rs34995376 | [Mata et al., 2005b]       |
| EX31 | g.90427G>C  | c.4324G>C | p.A1442P  | -          | [Huang et al., 2007]       |
| EX31 | g.90440C>T  | c.4337C>T | p.P1446L  | -          | [Zabetian et al., 2009]    |
| EX31 | g.90451G>A  | c.4348G>A | p.V1450I  | -          | [Zabetian et al., 2009]    |
| EX31 | g.90505A>G  | c.4402A>G | p.K1468E  | -          | [Nuytemans et al., 2008]   |
| EX31 | g.90551G>A  | c.4448G>A | p.R1483Q  | -          | [Nuytemans et al., 2008]   |
| EX32 | g.93966G>A  | c.4541G>A | p.R1514Q  | rs35507033 | [Zimprich et al., 2004a]   |
| EX32 | g.94049C>T  | c.4624C>T | p.P1542S  | rs33958906 | [Mata et al., 2005b]       |
| EX34 | g.99988T>C  | c.4838T>C | p.V1613A  | -          | [Pchelina et al., 2008]    |
| EX34 | g.100036G>C | c.4883G>C | p.R1628P  | rs33949390 | [Mata et al., 2005b]       |
| EX34 | g.100087T>C | c.4937T>C | p.M1646T  | rs35303786 | [Paisan-Ruiz et al., 2004] |
| EX34 | g.100089T>A | c.4939T>A | p.S1647T  | rs11564148 | [Mata et al., 2005b]       |
| EX35 | g.101104A>T | c.5096A>G | p.Y1699C  | rs35801418 | [Paisan-Ruiz et al., 2004] |
| EX36 | g.102037G>A | c.5183G>A | p.R1728H  | -          | [Paisan-Ruiz et al., 2008] |
| EX36 | g.102037G>T | c.5183G>T | p.R1728L  | -          | [Paisan-Ruiz et al., 2008] |
| EX37 | g.102376G>T | c.5385G>T | p.L1795F  | -          | [Nichols et al., 2007]     |
| EX38 | g.103245A>G | c.5605A>G | p.M1869V  | -          | [Di Fonzo et al., 2006b]   |
| EX38 | g.103246T>C | c.5606T>C | p.M1869T† | rs35602796 | [Farrer et al., 2005]      |
| EX38 | g.103250G>T | c.5610G>T | p.L1870F* | -          | [Paisan-Ruiz et al., 2008] |
| EX38 | g.103260G>T | c.5620G>T | p.E1874X  | -          | [Di Fonzo et al., 2006b]   |
| EX40 | g.115021G>A | c.5822G>A | p.R1941H  | -          | [Khan et al., 2005b]       |
| EX41 | g.120351T>C | c.6016T>C | p.Y2006H  | -          | [Lesage et al., 2007a]     |
| EX41 | g.120370T>C | c.6035T>C | p.I2012T  | rs34015634 | [Tomiyama et al., 2006]    |
| EX41 | g.120390G>A | c.6055G>A | p.G2019S† | rs34637584 | [Di Fonzo et al., 2005]    |
| EX41 | g.120394T>C | c.6059T>C | p.I2020T  | rs35870237 | [Zimprich et al., 2004a]   |
| EX41 | g.120426A>T | c.6091A>T | p.T2031S  | -          | [Lesage et al., 2007a]     |
| EX42 | g.126874A>G | c.6241A>G | p.N2081D  | rs33995883 | [Zimprich et al., 2004a]   |
| EX44 | g.131569C>T | c.6422C>T | p.T2141M  | -          | [Paisan-Ruiz et al., 2008] |
| EX44 | g.131575G>A | c.6428G>A | p.R2143H  | -          | [Paisan-Ruiz et al., 2008] |

|      |                       |                     |                 |                   |                            |
|------|-----------------------|---------------------|-----------------|-------------------|----------------------------|
| EX44 | g.131713A>G           | c.6566A>G           | p.Y2189C        | rs35658131        | [Nuytemans et al., 2008]   |
| EX48 | g.143430C>T           | c.7067C>T           | p.T2356I        | -                 | [Khan et al., 2005b]       |
| EX48 | <i>g.143516G&gt;A</i> | <i>c.7153G&gt;A</i> | <i>p.G2385R</i> | <i>rs34778348</i> | [Mata et al., 2005b]       |
| EX48 | g.143531G>A           | c.7168G>A           | p.V2390M        | -                 | [Clarimon et al., 2008]    |
| EX49 | g.144833G>A           | c.7183G>A           | p.E2395K*,§     | -                 | [Paisan-Ruiz et al., 2008] |
| EX49 | <i>g.144840T&gt;C</i> | <i>c.7190T&gt;C</i> | <i>p.M2397T</i> | <i>rs3761863</i>  | [Paisan-Ruiz et al., 2005] |
| EX50 | g.147002T>A           | c.7397T>A           | p.L2466H        | -                 | [Paisan-Ruiz et al., 2008] |
| EX51 | g.147639delC          | c.7468delC          | p.Q2490NfsX3†   | -                 | [Nuytemans et al., 2009]   |

## (b) Splice, silent and UTR variants

| Region | NG numbering             | cDNA Numbering      | Alias                | dbSNP number      | Reference                  |
|--------|--------------------------|---------------------|----------------------|-------------------|----------------------------|
| 5'UTR  | g.5078G>T                | c.-44G>T            | c.-44G>T             | -                 | [Paisan-Ruiz et al., 2008] |
| 5'UTR  | g.5092G>C                | c.-30G>C            | c.-30G>C             | rs72546314        | [Lesage et al., 2009]      |
| EX5    | <i>g.17979T&gt;C</i>     | <i>c.457T&gt;C</i>  | <i>p.L153</i>        | <i>rs10878245</i> | [Mata et al., 2005b]       |
| EX5    | <i>g.18068A&gt;G</i>     | <i>c.546A&gt;G</i>  | <i>p.K182</i>        | <i>rs35517158</i> | [Mata et al., 2005b]       |
| EX7    | <i>g.23658T&gt;C</i>     | <i>c.825T&gt;C</i>  | <i>p.H275</i>        | -                 | [Paisan-Ruiz et al., 2008] |
| EX8    | g.29844C>T               | c.867C>T            | p.N289               | rs17490713        | [Paisan-Ruiz et al., 2008] |
| EX8    | g.29913G>T               | c.936G>T            | p.A312               | rs41286466        | [Nuytemans et al., 2009]   |
| IVS9   | <i>g.31445G&gt;A</i>     | -                   | <i>IVS9-10C&gt;A</i> | <i>rs7955902</i>  | [Di Fonzo et al., 2006a]   |
| IVS10  | g.32896A>G               | -                   | IVS10-4A>G*          | rs7135747         | [Paisan-Ruiz et al., 2008] |
| EX12   | <i>g.37332T&gt;C</i>     | <i>c.1383T&gt;C</i> | <i>p.S461</i>        | <i>rs35847451</i> | [Mata et al., 2005b]       |
| EX13   | <i>g.39515A&gt;T</i>     | <i>c.1464A&gt;T</i> | <i>p.L488</i>        | -                 | [Nichols et al., 2007]     |
| IVS16  | g.57864delT              | -                   | IVS16-14delT*        | -                 | [Paisan-Ruiz et al., 2008] |
| EX17   | g.57958A>C               | c.2022A>C           | p.V674               | rs72546319        | [Lesage et al., 2009]      |
| EX18   | g.58131C>T               | c.2121C>T           | p.Y707*              | -                 | [Paisan-Ruiz et al., 2008] |
| EX19   | <i>g.64106T&gt;C</i>     | <i>c.2481T&gt;C</i> | <i>p.S827</i>        | -                 | [Nichols et al., 2007]     |
| IVS19  | g.64128_64131delGTAA     | -                   | IVS19+5_8delGTAA     | -                 | [Johnson et al., 2007]     |
| IVS19  | <i>g.67332_67333insT</i> | -                   | <i>IVS19-9_8insT</i> | <i>rs36220740</i> | [Di Fonzo et al., 2006a]   |
| EX22   | <i>g.74883T&gt;C</i>     | <i>c.2857T&gt;C</i> | <i>p.L953</i>        | <i>rs7966550</i>  | [Paisan-Ruiz et al., 2005] |
| EX24   | <i>g.78478A&gt;G</i>     | <i>c.3342A&gt;G</i> | <i>p.L1114§</i>      | <i>rs35808389</i> | [Zimprich et al., 2004a]   |
| IVS25  | g.82771delT              | -                   | IVS25-8delT†         | -                 | [Paisan-Ruiz et al., 2008] |
| IVS27  | g.85764C>T               | -                   | IVS27-9C>T           | -                 | [Paisan-Ruiz et al., 2008] |
| EX30   | <i>g.89175G&gt;A</i>     | <i>c.4269G&gt;A</i> | <i>p.K1423</i>       | <i>rs11175964</i> | [Mata et al., 2005b]       |
| EX30   | g.89196C>T               | c.4290C>T           | p.A1430              | -                 | [Paisan-Ruiz et al., 2008] |
| IVS30  | <i>g.89235delT</i>       | -                   | <i>IVS30+12delT†</i> | -                 | [Di Fonzo et al., 2006a]   |
| IVS30  | g.90415C>T               | -                   | IVS30-6C>T           | rs56082834        | [Nuytemans et al., 2009]   |
| EX31   | g.90426C>T               | c.4323C>T           | p.R1441§             | -                 | [Gaig et al., 2008]        |

|             |                       |                     |                 |                   |                             |
|-------------|-----------------------|---------------------|-----------------|-------------------|-----------------------------|
| IVS31       | g.90642A>G            | -                   | IVS31+3A>G      | rs41286476        | [Zabetian et al., 2005]     |
| IVS32       | g.94177G>A            | -                   | IVS32+14G>A     | rs72546328        | [Lesage et al., 2009]       |
| IVS33       | g.95296T>A            | -                   | IVS33+6T>A      | -                 | [Skipper et al., 2005]      |
| <i>EX34</i> | <i>g.100022C&gt;A</i> | <i>c.4872C&gt;A</i> | <i>p.G1624</i>  | <i>rs1427263</i>  | [Paisan-Ruiz et al., 2005]  |
| <i>EX34</i> | <i>g.100061A&gt;G</i> | <i>c.4911A&gt;G</i> | <i>p.K1637</i>  | <i>rs11176013</i> | [Mata et al., 2005b]        |
| <i>EX37</i> | <i>g.102448T&gt;C</i> | <i>c.5457T&gt;C</i> | <i>p.G1819</i>  | <i>rs10878371</i> | [Mata et al., 2005b]        |
| IVS37       | g.103141A>G           | -                   | IVS37-9A>G†     | rs41286460        | [Di Fonzo et al., 2006a]    |
| IVS38       | g.103303C>T           | -                   | IVS38+7C>T      | rs36212069        | [Paisan-Ruiz et al., 2008]  |
| <i>EX41</i> | <i>g.120348C&gt;T</i> | <i>c.6013C&gt;T</i> | <i>p.L2005*</i> | -                 | [Orr-Urtreger et al., 2007] |
| <i>EX41</i> | <i>g.120389C&gt;T</i> | <i>c.6054C&gt;T</i> | <i>p.Y2018*</i> | -                 | [Orr-Urtreger et al., 2007] |
| <i>EX43</i> | <i>g.128442G&gt;A</i> | <i>c.6324G&gt;A</i> | <i>p.E2108</i>  | <i>rs10878405</i> | [Mata et al., 2005b]        |
| <i>EX44</i> | <i>g.131657C&gt;A</i> | <i>c.6510C&gt;A</i> | <i>p.G2170</i>  | <i>rs34869625</i> | [Mata et al., 2005b]        |
| IVS46       | g.139236T>A           | -                   | IVS46-14T>A     | rs72546333        | [Lesage et al., 2009]       |
| IVS46       | g.139242delT          | -                   | IVS46-8delT     | rs72546334        | [Lesage et al., 2009]       |
| IVS47       | g.143383delT          | -                   | IVS47-9delT     | rs11317573        | [Di Fonzo et al., 2006a]    |
| <i>EX48</i> | <i>g.143518A&gt;G</i> | <i>c.7155A&gt;G</i> | <i>p.G2385</i>  | <i>rs33962975</i> | [Mata et al., 2005b]        |
| EX49        | g.144946C>G           | c.7296C>G           | p.G2432*        | -                 | [Paisan-Ruiz et al., 2008]  |

For all references please visit the Parkinson Disease mutation database PDmutDB (<http://www.molgen.ua.ac.be/PDmutDB>).

<sup>(a)</sup> NG numbering: NG\_011709.1; cDNA numbering: NM\_198578.2; protein numbering: NP\_940980.3. Nucleotide numbering reflects cDNA numbering with +1 corresponding to the A of the ATG translation initiation codon in the reference sequence, according to journal guidelines ([www.hgvs.org/mutnomen](http://www.hgvs.org/mutnomen)). The initiation codon is codon 1.

\* Only observed in control individuals;

† Also observed in control individuals;

§ In proximity to exon/intron boundary;

*Italic*: known polymorphism

**Supp. Table S3-1. *PARK2* Classic mutations** <sup>(a)</sup>

| (a) Missense, nonsense and frameshift mutations |                         |                 |                   |                      |              |                          |
|-------------------------------------------------|-------------------------|-----------------|-------------------|----------------------|--------------|--------------------------|
| Region                                          | NG numbering            | cDNA Numbering  | Protein Numbering | Alias                | dbSNP number | Reference                |
| EX1                                             | g.0005135A>T            | c.1A>T          | p.0?              | Met1Leu              | -            | [Rawal et al., 2003]     |
| EX                                              | g.0289335G>A            | c.13G>A         | p.V5I             | Val5Ile              | -            | [Camargos et al., 2009]  |
| EX2                                             | g.0289351G>A            | c.29G>A         | p.S10N            | Ser10Asn             | -            | [Nuytemans et al., 2009] |
| EX2                                             | g.0289356G>C            | c.34G>C         | p.G12R            | Gly12Arg             | -            | [Mellick et al., 2009]   |
| EX2                                             | g.0289365G>A            | c.43G>A         | p.V15M            | Val15Met             | -            | [Munoz et al., 2002]     |
| EX2                                             | g.0289374G>A            | c.52G>A         | p.D18N            | Asp18Asn             | -            | [Annesi et al., 2007]    |
| EX2                                             | g.0289414C>A            | c.92C>A         | p.A31D            | Ala31Asp             | -            | [Chaudhary et al., 2006] |
| EX2                                             | g.0289417A>C            | c.95A>C         | p.K32T            | Lys32Thr             | -            | [Tarantino et al., 2007] |
| EX2                                             | g.0289419C>T            | c.97C>T         | p.R33X            | Arg33Stop            | -            | [Maruyama et al., 2000]  |
| EX2                                             | g.0289420G>A            | c.98G>A         | p.R33Q            | Arg33Gln             | -            | [Hertz et al., 2006]     |
| EX2                                             | g.0289423delA           | c.101delA       | p.Q34RfsX10       | Gln34fs              | -            | [Nisipeanu et al., 2001] |
| EX2                                             | g.0289423_0289424delAG  | c.101_102delAG  | p.Q34RfsX5        | Gln34fs              | rs55777503   | [Abbas et al., 1999]     |
| EX2                                             | g.0289423A>G            | c.101A>G        | p.Q34R            | Gln34Arg             | -            | [Biswas et al., 2006]    |
| EX2                                             | g.0289432C>T            | c.110C>T        | p.P37L            | Pro37Leu             | -            | [Kann et al., 2002]      |
| EX2                                             | g.0289440C>T            | c.118C>T        | p.Q40X            | Gln40Stop            | -            | [Choi et al., 2008]      |
| EX2                                             | g.0289446C>T            | c.124C>T        | p.R42C            | Arg42Cys             | -            | [Biswas et al., 2006]    |
| EX2                                             | g.0289447G>A            | c.125G>A        | p.R42H            | Arg42His             | -            | [Madegowda et al., 2005] |
| EX2                                             | g.0289447G>C            | c.125G>C        | p.R42P            | Arg42Pro             | -            | [Terreni et al., 2001]   |
| EX2                                             | g.0289458G>A            | c.136G>A        | p.A46T            | Ala46Thr             | -            | [Okubadejo et al., 2008] |
| EX2                                             | g.0289458G>C            | c.136G>C        | p.A46P            | Ala46Pro             | -            | [Xu et al., 2002]        |
| EX2                                             | g.0289477delA           | c.155delA       | p.N52MfsX29       | Asn52fs              | -            | [Lucking et al., 2000]   |
| EX2                                             | g.0289478_0289479insT   | c.156_157insT   | p.D53X            | Asp53Stop            | -            | [Aguiar et al., 2008]    |
| EX2                                             | g.0289482T>A            | c.160T>A        | p.W54R            | Trp54Arg             | -            | [Camargos et al., 2009]  |
| EX2                                             | g.0289486C>T            | c.164C>T        | p.T55I            | Thr55Ile             | -            | [Rocca et al., 2007]     |
| EX2                                             | g.0289489T>A            | c.167T>A        | p.V56E            | Val56Glu             | -            | [Hoenicka et al., 2002]  |
| EX3                                             | g.0470086_0470087insGT  | c.220_221insGT  | p.W74CfsX8        | Trp74fs              | -            | [Abbas et al., 1999]     |
| EX3                                             | g.0470101G>T            | c.235G>T        | p.E79X            | Glu79Stop            | -            | [Foroud et al., 2003]    |
| EX3                                             | g.0470111C>A            | c.245C>A        | p.A82E†           | Ala82Glu             | rs55774500   | [Hedrich et al., 2001]   |
| EX3                                             | g.0470122G>A            | c.256G>A        | p.D86N            | Asp86Asn             | -            | [Ciro, I et al., 2007]   |
| EX3                                             | g.0470166G>C            | c.300G>C        | p.Q100H           | Gln100His            | -            | [Chen et al., 2003]      |
| EX3                                             | g.0470176C>T            | c.310C>T        | p.R104W           | Arg104Trp            | -            | [Varrone et al., 2004]   |
| EX3                                             | g.0470203_0470242del40  | c.337_376del40  | p.P113TfsX51      | Pro113fs / ex3 Δ40bp | -            | [Farrer et al., 2001a]   |
| EX3                                             | g.0470263_0470265delCCA | c.397_399delCCA | p.P133del         | Pro133del            | -            | [Hedrich et al., 2004b]  |

|     |               |           |              |            |            |                                |
|-----|---------------|-----------|--------------|------------|------------|--------------------------------|
| EX3 | g.0531566A>G  | c.428A>G  | p.Y143C      | Tyr134Cys  | -          | [Biswas et al., 2006]          |
| EX4 | g.0531572G>A  | c.434G>A  | p.S145N      | Ser145Asn  | -          | [Varrone et al., 2004]         |
| EX4 | g.0531596C>G  | c.458V>G  | p.P153R†     | Pro153Arg  | rs55654276 | [Wang et al., 2008]            |
| EX4 | g.0531621A>T  | c.483A>T  | p.K161N      | Lys161Asn  | -          | [Abbas et al., 1999]           |
| EX4 | g.0531635G>A  | c.497G>A  | p.C166T      | Cys166Tyr  | -          | [Brooks et al., 2009]          |
| EX4 | g.051638G>A   | c.500G>A  | p.S167N      | Ser167Asn  | rs1801474  | [Hattori et al., 1998a]        |
| EX4 | g.0531649C>T  | c.511C>T  | p.Q171X      | Gln171Stop | -          | [Brooks et al., 2009]          |
| EX4 | g.0531656C>T  | c.518C>T  | p.T173M*     | Thr173Met  | -          | [Kay et al., 2007]             |
| EX5 | g.0678630delG | c.536delG | p.G179VXfs9  | Gly179fs   | -          | [Hattori et al., 1998a]        |
| EX5 | g.0678668A>C  | c.574A>C  | p.M192L      | Met192Leu  | rs9456735  | [Hedrich et al., 2002]         |
| EX5 | g.0678668A>G  | c.574A>G  | p.M192V      | Met192Val  | -          | [Dachsel et al., 2006]         |
| EX5 | g.0678694C>G  | c.600C>G  | p.H200Q      | His200Gln  | rs72480421 | [Bardien et al., 2009]         |
| EX6 | g.0759399A>G  | c.632A>G  | p.K211R      | Lys211Arg  | -          | [Periquet et al., 2001]        |
| EX6 | g.0759400A>T  | c.633A>T  | p.K211N      | Lys211Asn  | -          | [Lucking et al., 2000]         |
| EX6 | g.0759401delT | c.634delT | p.C212VfsX13 | Cys212fs   | -          | [Sironi et al., 2008]          |
| EX6 | g.0759401T>G  | c.634T>G  | p.C212G      | Cys212Gly  | -          | [Shyu et al., 2005]            |
| EX6 | g.0759402G>A  | c.635G>A  | p.C212Y      | Cys212Tyr  | -          | [Pineda-Trujillo et al., 2001] |
| EX6 | g.0759412C>A  | c.645C>A  | p.H215Q      | His215Gln  | -          | [Pigullo et al., 2004]         |
| EX6 | g.0759455G>A  | c.688G>A  | p.A230T      | Ala230Thr  | -          | [Sironi et al., 2008]          |
| EX6 | g.0759468G>A  | c.701G>A  | p.R234Q      | Arg234Gln  | -          | [Hertz et al., 2006]           |
| EX6 | g.0759481C>G  | c.714G>A  | p.C238W      | Cys238Trp  | -          | [Sironi et al., 2008]          |
| EX6 | g.0759486C>G  | c.719C>G  | p.T240R      | Thr240Arg  | -          | [Hattori et al., 1998b]        |
| EX6 | g.0759486C>T  | c.719C>T  | p.T240M      | Thr240Met  | -          | [Periquet et al., 2003]        |
| EX6 | g.0759494G>A  | c.727G>A  | p.D243N†     | Asp243Asn  | -          | [Romito et al., 2005]          |
| EX6 | g.0759497G>A  | c.730G>A  | p.V244I*,§   | Val244Ile  | -          | [Kay et al., 2007]             |
| EX7 | g.0946918G>A  | c.758G>A  | p.C253Y      | Cys253Tyr  | -          | [Sironi et al., 2008]          |
| EX7 | g.0946918G>T  | c.758G>T  | p.C253F      | Cys253Phe  | -          | [Guo et al., 2008]             |
| EX7 | g.0946919C>G  | c.759C>G  | p.C253W      | Cys253Trp  | -          | [Oliveira et al., 2003]        |
| EX7 | g.0946926C>T  | c.766C>T  | p.R256C      | Arg256Cys  | -          | [Abbas et al., 1999]           |
| EX7 | g.0946932G>A  | c.772G>A  | p.V258M      | Val258Met  | -          | [Shyu et al., 2005]            |
| EX7 | g.0946954A>G  | c.794A>G  | p.H265R      | His265Arg  | -          | [Nuytemans et al., 2009]       |
| EX7 | g.0946959T>C  | c.799T>C  | p.Y267H      | Tyr267His  | -          | [Lee et al., 2009]             |
| EX7 | g.0946964T>A  | c.804T>A  | p.C268X      | Cys268Stop | -          | [Lucking et al., 2000]         |
| EX7 | g.0946973A>T  | c.813A>T  | p.R271S      | Arg271Ser  | -          | [Chen et al., 2003]            |
| EX7 | g.0946974C>A  | c.814C>A  | p.L272I      | Leu272Ile  | -          | [Li et al., 2005a]             |
| EX7 | g.0946978A>G  | c.818A>G  | p.N273S†     | Asn273Ser  | -          | [Lesage et al., 2008]          |

|      |                        |                     |                |                  |                   |                               |
|------|------------------------|---------------------|----------------|------------------|-------------------|-------------------------------|
| EX7  | g.0946983C>T           | c.823C>T            | p.R275W†       | Arg275Trp        | rs34424986        | [Abbas et al., 1999]          |
| EX7  | g.0946998G>A           | c.838G>A            | p.D280N        | Asp280Asn        | rs72480422        | [Lucking et al., 2000]        |
| EX7  | g.0947008T>C           | c.848T>C            | p.L283P        | Leu283Pro        | rs56754308        | [Macedo et al., 2009]         |
| EX7  | g.0947010G>C           | c.850G>C            | p.G284R        | Gly284Arg        | -                 | [Wu et al., 2005]             |
| EX7  | g.0947025T>G           | c.865T>G            | p.C289G§       | Cys289Gly        | rs55961220        | [Lucking et al., 2000]        |
| EX7  | g.0947031delG          | c.871delG           | p.A291LfsX7    | Ala291fs         | -                 | [Munoz et al., 2000]          |
| EX8  | g.1163407A>C           | c.892A>C            | p.I298L        | Ile298Leu        | -                 | [Wang et al., 2008]           |
| EX8  | g.1163408T>G           | c.893T>G            | p.I298S        | Ile298Ser        | -                 | [Lesage et al., 2008]         |
| EX8  | g.1163445G>C           | c.930G>C            | p.E310D        | Glu310Asp        | rs72480423        | [Bardien et al., 2009]        |
| EX8  | g.1163446C>T           | c.931C>T            | p.Q311X        | Gln311Stop       | -                 | [Hattori et al., 1998b]       |
| EX8  | g.1163448G>T           | c.933G>T            | p.Q311H§       | Gln311His        | -                 | [Shyu et al., 2005]           |
| EX9  | g.1183834_1183839del6  | c.968_973delGTGTCC  | p.C323_V324del | Cys323fs         | -                 | [Guo et al., 2008]            |
| EX9  | g.1183837delT          | c.971delT           | p.V324AfsX111  | Val324fs         | -                 | [Klein et al., 2000]          |
| EX9  | g.1183849G>A           | c.983G>A            | p.G328E        | Gly328Glu        | -                 | [Lucking et al., 2000]        |
| EX9  | g.1183866C>T           | c.1000C>T           | p.R334C†       | Arg334Cys        | -                 | [Lucking et al., 2000]        |
| EX9  | g.1183867G>A           | c.1001G>A           | p.R334H        | Arg334His        | -                 | [Okubadejo et al., 2008]      |
| EX9  | <i>g.1183881G&gt;T</i> | <i>c.1015G&gt;T</i> | <i>p.A339S</i> | <i>Ala339Ser</i> | -                 | [Chen et al., 2003]           |
| EX9  | g.1183907_1183908delGA | c.1041_1042delGA    | p.R348EfsX21   | Arg348fs         | -                 | [Lucking et al., 2000]        |
| EX9  | g.1183912_1183913delAA | c.1046_1047delAA    | p.K349SfsX20   | Lys349fs         | -                 | [Hedrich et al., 2001]        |
| EX9  | g.1183917A>C           | c.1051A>C           | p.T351P        | Thr351Pro        | -                 | [Kann et al., 2002]           |
| EX9  | g.1183942G>A           | c.1076G>A           | p.G359D†       | Gly359Asp        | -                 | [Madegowda et al., 2005]      |
| EX10 | <i>g.1345938C&gt;T</i> | <i>c.1096C&gt;T</i> | <i>p.R366W</i> | <i>Arg366Trp</i> | <i>rs56092260</i> | [Wang et al., 1999]           |
| EX10 | g.1345939G>A           | c.1097G>A           | p.R366Q        | Arg366Gln        | -                 | [Wang et al., 2008]           |
| EX10 | <i>g.1345980G&gt;C</i> | <i>c.1138G&gt;C</i> | <i>p.V380L</i> | <i>Val380Leu</i> | <i>rs1801582</i>  | [Abbas et al., 1999]          |
| EX11 | g.1372605delGA         | c.1175_1176delGA    | p.R392SfsX3    | Arg392fs         | -                 | [Alvarez et al., 2001]        |
| EX11 | <i>g.1372610G&gt;A</i> | <i>c.1180G&gt;A</i> | <i>p.D394N</i> | <i>Asp394Asn</i> | <i>rs1801334</i>  | [Abbas et al., 1999]          |
| EX11 | g.1372613G>T           | c.1183G>T           | p.E395X        | Glu395Stop       | -                 | [Bras et al., 2008]           |
| EX11 | g.1372616A>G           | c.1186A>G           | p.R396G        | Arg396Gly        | -                 | [Wu et al., 2005]             |
| EX11 | g.1372622G>A           | c.1192G>A           | p.A398T        | Ala398Thr        | -                 | [Periquet et al., 2003]       |
| EX11 | g.1372634C>T           | c.1204C>T           | p.R402C†       | Arg402Cys        | rs55830907        | [Poorkaj et al., 2004]        |
| EX11 | g.1372635G>A           | c.1205G>A           | p.R402H        | Arg402His        | -                 | [Sun et al., 2006]            |
| EX11 | g.1372655G>T           | c.1225G>T           | p.E409X        | Glu409Stop       | -                 | [Sironi et al., 2008]         |
| EX11 | g.1372674C>A           | c.1244C>A           | p.T415N†       | Thr415Asn        | -                 | [Abbas et al., 1999]          |
| EX11 | g.1372682T>C           | c.1252T>C           | p.C418R        | Cys418Arg        | -                 | [Bertoli-Avella et al., 2005] |
| EX11 | g.1372691_1372692insA  | c.1283_1284insA     | p.N428KfsX141  | Asn428fs         | -                 | [Rawal et al., 2003]          |
| EX12 | g.1382592G>A           | c.1286G>A           | p.G429E§       | Gly429Glu        | -                 | [Bruggemann et al., 2009]     |

|      |                       |                 |               |            |            |                          |
|------|-----------------------|-----------------|---------------|------------|------------|--------------------------|
| EX12 | g.1382595G>A          | c.1289G>A       | p.G430D       | Gly430Asp  | -          | [Lucking et al., 2000]   |
| EX12 | g.1382598G>T          | c.1292G>T       | p.C431F       | Cys431Phe  | -          | [Maruyama et al., 2000]  |
| EX12 | g.1382616C>T          | c.1310C>T       | p.P437L†      | Pro437Leu  | -          | [Hedrich et al., 2002]   |
| EX12 | g.1382627T>C          | c.1321T>C       | p.C441R       | Cys441Arg  | -          | [Shyu et al., 2005]      |
| EX12 | g.1382636G>C          | c.1330G>C       | p.E444Q       | Glu444Gln  | -          | [Madegowda et al., 2005] |
| EX12 | g.1382641G>A          | c.1335G>A       | p.W445X       | Trp445Stop | -          | [Rawal et al., 2003]     |
| EX12 | g.1382664G>A          | c.1358G>A       | p.W453X       | Trp453Stop | rs34424986 | [Abbas et al., 1999]     |
| EX12 | g.1382678A>C          | c.1372A>C       | p.M458L       | Met458Leu  | -          | [Brooks et al., 2009]    |
| EX12 | g.1382684_1382685insG | c.1378_1379insG | p.D460GfsX109 | Asp460fs   | -          | [Chan et al., 2008]      |
| EX12 | g.1382699G>A          | c.1393G>A       | p.V465M       | Val465Met  | -          | [Pigullo et al., 2004]   |

## (b) Splice, silent and UTR variants

| Region | NG numbering | cDNA Numbering | Protein Numbering | Alias      | dbSNP number | Reference                   |
|--------|--------------|----------------|-------------------|------------|--------------|-----------------------------|
| 5'UTR  | g.0005082C>T | c.-53C>T       | p.*               | c.-53C>T   | -            | [Kay et al., 2007]          |
| 5'UTR  | g.0005091C>A | c.-44C>A       | p.?               | c.-44C>A   | -            | [Kay et al., 2007]          |
| 5'UTR  | g.0005096G>T | c.-39G>T       | p.?               | c.-39G>T   | -            | [Bruggemann et al., 2009]   |
| 5'UTR  | g.0005114G>T | c.-21G>T       | p.?               | c.-21G>T   | -            | [Hedrich et al., 2002]      |
| 5'UTR  | g.0005129G>C | c.-6G>C        | p.?               | c.-6G>C    | -            | [Varrone et al., 2004]      |
| IVS1   | g.0005142G>A | -              | p.?               | IVS1+1G>A  | -            | [Illarioshkin et al., 2003] |
| EX2    | g.0289370G>A | c.48G>A        | p.E16†            | Glu16      | -            | [Okubadejo et al., 2008]    |
| EX3    | g.0289373C>x | c.51C>x        | p.V17             | Val17      | -            | [Myhre et al., 2008a]       |
| EX3    | g.0289433G>A | c.111G>A       | p.P37             | Pro37      | -            | [Okubadejo et al., 2008]    |
| EX3    | g.047238C>T  | c.372C>T       | p.H124            | His124     | -            | [Chen et al., 2003]         |
| EX4    | g.0531660C>T | c.522C>T       | p.L174            | Leu174     | -            | [Brooks et al., 2009]       |
| EX4    | g.0531669C>A | c.531C>A       | p.T177*,§         | Thr177     | -            | [Kay et al., 2007]          |
| IVS4   | g.0531682T>C | -              | p.?               | IVS4+10T>C | -            | [Chan et al., 2008]         |
| IVS5   | g.0678714T>A | -              | p.?               | IVS5+2T>A  | -            | [Scherfler et al., 2004]    |
| EX7    | g.0946925A>T | c.765A>T       | p.S255†           | Ser255     | -            | [Kay et al., 2007]          |
| EX7    | g.0946943A>G | c.783A>G       | p.L261            | Leu261     | rs9456711    | [Hedrich et al., 2002]      |
| EX7    | g.0946976C>T | c.816C>T       | p.L272            | Leu272     | -            | [Chaudhary et al., 2006]    |
| EX7    | g.0946997C>T | c.837C>T       | p.H279            | His279     | -            | [Pigullo et al., 2004]      |
| IVS7   | g.1163384C>G | -              | p.?               | IVS7-3C>G  | -            | [Nuytemans et al., 2009]    |
| IVS7   | g.1163386G>C | -              | p.?               | IVS7-1G>C  | -            | [Rawal et al., 2003]        |
| EX8    | g.1163434C>T | c.919C>T       | p.L307            | Leu307     | -            | [Sironi et al., 2008]       |
| IVS8   | g.1183797C>T | -              | p.?               | IVS8-3C>T  | -            | [Pigullo et al., 2004]      |
| EX9    | g.1183823T>C | c.957T>C       | p.G319            | Gly319     | -            | [Okubadejo et al., 2008]    |
| EX9    | g.1183883G>A | c.1017G>A      | p.A339            | Ala339     | -            | [Abbas et al., 1999]        |

|       |                          |                     |                 |                  |            |                               |
|-------|--------------------------|---------------------|-----------------|------------------|------------|-------------------------------|
| IVS9  | g.1345925G>A             | -                   | p.?             | IVS9-1G>A        | -          | [Nuytemans et al., 2009]      |
| EX11  | g.1372636T>C             | c.1206T>C           | p.R402          | Arg402           | -          | [Bardien et al., 2009]        |
| IVS11 | g.1382589C>G             | -                   | p.*/p.G429EfsX5 | IVS11-3C>G       | -          | [Bertoli-Avella et al., 2005] |
| 3'UTR | g.1382720G>A             | c.*16G>A            | p.?             | *16G>A           | rs61730194 | [Bardien et al., 2009]        |
| 3'UTR | g.1382798A>G             | c.*94A>G            | p.*†            | *94A>G           | rs62637702 | [Sironi et al., 2008]         |
| 3'UTR | g.1382798_1382799delins4 | c.*94_*95delinsGCGC | p.?             | *94_95delinsGCGC | -          | [Sironi et al., 2008]         |
| 3'UTR | g.1382807C>T             | c.*103C>T           | p.?             | *103C>T          | -          | [Bardien et al., 2009]        |

**Supp. Table S3-2. *PARK2* copy number variations<sup>(a)</sup>**

| Region   | NG Numbering             | cDNA Numbering                      | Protein Numbering | Alias            | Reference                    |
|----------|--------------------------|-------------------------------------|-------------------|------------------|------------------------------|
| Prom+EX1 | -                        | c.(8-?)_oPACRG:(157-?)del           | p.0               | prom+ex1del (NP) | [Lesage et al., 2007b]       |
| EX1      | -                        | c.(-134-?)_(7+?)del                 | p.?               | ex1del (NP)      | [Hedrich et al., 2002]       |
| EX1      | -                        | c.(-134-?)_(7+?)del                 | p.?               | ex1dup (NP)      | [Sun et al., 2006]           |
| EX1-4    | -                        | c.(-134-?)_(534+?)del               | p.?               | ex1-4del (NP)    | [Chung et al., 2008]         |
| EX2      | -                        | c.(8-?)_(171+?)del                  | p.V3EfsX3         | ex2del (NP)      | [Lucking et al., 2000]       |
| EX2      | -                        | c.(8-?)_(171+?)dup                  | p.*/p.N58CfsX41†  | ex2dup (NP)      | [Simon-Sanchez et al., 2008] |
| EX2      | -                        | c.(8-?)_(171+?) [3]                 | p.N58CfsX41       | ex2trip (NP)     | [Lucking et al., 2000]       |
| EX2-3    | -                        | c.(8-?)_(412+?)del                  | p.V3AfsX329       | ex2-3del (NP)    | [Lucking et al., 2000]       |
| EX2-3    | -                        | c.(8-?)_(412+?)dup                  | p.*/p.A138VfsX464 | ex2-3dup (NP)    | [Nichols et al., 2002]       |
| EX2-4    | -                        | c.(8-?)_(534+?)del                  | p.V3GfsX7         | ex2-4del (NP)    | [Maruyama et al., 2000]      |
| EX2-4    | -                        | c.(8-?)_(534+?)dup                  | p.*/p.G179CfsX41† | ex2-4dup (NP)    | [Periquet et al., 2003]      |
| EX2-4    | -                        | c.(8-?)_(534+?) [3]                 | p.*/p.G179CfsX41  | ex2-4trip (NP)   | [Mata et al., 2005a]         |
| EX2-5    | -                        | c.(8-?)_(618+?)del                  | p.V3GfsX5         | ex2-5del (NP)    | [Kann et al., 2002]          |
| EX2-12   | -                        | c.(8-?)_(3939+?)dup                 | p.?               | ex2-12dup (NP)   | [Nuytemans et al., 2009]     |
| EX3      | -                        | c.(172-?)_(412+?)del                | p.N58QfsX39       | ex3del (NP)      | [Hattori et al., 1998a]      |
| EX3      | -                        | c.(172-?)_(412+?)dup                | p.*/p.A138EfsX3   | ex3dup (NP)      | [Lucking et al., 2000]       |
| EX3-4    | -                        | c.(172-?)_(534+?)del                | p.N58_Q178del     | ex3-4del (NP)    | [Hattori et al., 1998a]      |
| EX3-4    | -                        | c.(172-?)_(534+?)dup                | p.*/p.N58_Q178dup | ex3-4dup (NP)    | [Periquet et al., 2003]      |
| EX3-5    | -                        | c.(172-?)_(618+?)del                | p.N58_A206del     | ex3-5del (NP)    | [Kobayashi et al., 2000]     |
| EX3-6    | -                        | c.(172-?)_(734+?)del                | p.N58EfsX29       | ex3-6del (NP)    | [Lucking et al., 2000]       |
| EX3-7    | -                        | c.(172-?)_(871+?)del                | p.A291LfsX7       | ex3-7del (NP)    | [Kitada et al., 1998]        |
| EX3-9    | -                        | c.(172-?)_(1083+?)del               | p.N58_G361del     | ex3-9del (NP)    | [Lucking et al., 2000]       |
| EX4      | g.0484957_0641130del     | c.(413-46594)_(534+109486)del156202 | p.A138GfsX7       | ex4del           | [Clarimon et al., 2005]      |
| EX4      | g.0529909_0531657del1749 | c.(413-1642)_519del1749             | p.G139HfsX11      | partial ex4del   | [Khan et al., 2005a]         |
| EX4      | -                        | c.(413-?)_(534+?)del                | p.A138GfsX7       | ex4del (NP)      | [Kitada et al., 1998]        |
| EX4      | -                        | c.(413-?)_(534+?)dup                | p.*/p.G179QfsX39  | ex4dup (NP)      | [Hedrich et al., 2001]       |

|         |                           |                                     |                    |                 |                               |
|---------|---------------------------|-------------------------------------|--------------------|-----------------|-------------------------------|
| EX4-5   | -                         | c.(413-?)_(618+?)del                | p.G139NfsX18       | ex4-5del (NP)   | [Kann et al., 2002]           |
| EX4-6   | -                         | c.(413-?)_(734+?)del                | p.A138GfsX14       | ex4-6del (NP)   | [Nichols et al., 2002]        |
| EX4-7   | -                         | c.(413-?)_(871+?)del                | p.R140CXfs174      | ex4-7del (NP)   | [Rawal et al., 2003]          |
| EX5     | g.0574670_0702743del12813 | c.(535-104015)_(618+24031)del128130 | p.G179_A206del     | ex5del          | [Bayrakli et al., 2007]       |
| EX5     | -                         | c.(535-?)_(618+?)del                | p.G179_A206del     | ex5del (NP)     | [Hattori et al., 1998a]       |
| EX5     | -                         | c.(535-?)_(618+?)dup                | p.*/p.G179_A206dup | ex5dup (NP)     | [Hedrich et al., 2002]        |
| EX5-6   | -                         | c.(535-?)_(734+?)del                | p.G179EfsX29       | ex5-6del (NP)   | [Lucking et al., 2000]        |
| EX5-7   | -                         | c.(535-?)_(871+?)del                | p.G179LfsX7        | ex5-7del (NP)   | [Leroy et al., 1998a]         |
| EX5-8   | -                         | c.(535-?)_(933+?)dup                | p.*/p.G179_Q311dup | ex5-8dup (NP)   | [Hertz et al., 2006]          |
| EX5-9   | -                         | c.(535-?)_(1083+?)dup               | p.*/p.G179_G361dup | ex5-9dup (NP)   | [Brooks et al., 2009]         |
| EX5-12  | -                         | c.(535-?)_(3939+?)del               | p.G179_V465del     | ex5-12del (NP)  | [Moro et al., 2008]           |
| EX6     | -                         | c.(619-?)_(734+?)del                | p.F208PfsX28†      | ex6del (NP)     | [Nichols et al., 2002]        |
| EX6     | -                         | c.(619-?)_(734+?)dup                | p.*/p.S246NfsX18   | ex6dup (NP)     | [Lucking et al., 2000]        |
| EX6-7   | -                         | c.(619-?)_(871+?)del                | p.E207LfsX7        | ex6-7del (NP)   | [Maruyama et al., 2000]       |
| EX6-8   | -                         | c.(619-?)_(933+?)dup                | p.*/p.F207_Q311dup | ex6-8dup (NP)   | [Sun et al., 2006]            |
| EX7     | -                         | c.(735-?)_(871+?)del                | p.R245SfsX9        | ex7del (NP)     | [Klein et al., 2000]          |
| EX7     | -                         | c.(735-?)_(871?)dup                 | p.*/p.A291GfsX14†  | ex7dup (NP)     | [Lucking et al., 2000]        |
| EX7-8   | -                         | c.(735-?)_(933+?)del                | p.R245SfsX124      | ex7-8del (NP)   | [Sun et al., 2006]            |
| EX7-9   | -                         | c.(735-?)_(1083+?)del               | p.R245SfsX74       | ex7-9del (NP)   | [Lucking et al., 2000]        |
| EX8     | -                         | c.(872-?)_(933+?)del                | p.A291VfsX35       | ex8del (NP)     | [Lucking et al., 2000]        |
| EX8     | -                         | c.(872-?)_(933+?)dup                | p.*/p.Y312LfsX7    | ex8dup (NP)     | [Nichols et al., 2002]        |
| EX8-9   | -                         | c.(872-?)_(1083+?)del               | p.A291VfsX8        | ex8-9del (NP)   | [Lucking et al., 1998]        |
| EX8-10  | -                         | c.(872-?)_(1167+?)del               | p.A291GfsX6        | ex8-10del (NP)  | [Bertoli-Avella et al., 2005] |
| EX8-11  | -                         | c.(872-?)_(1285+?)del               | p.A291GfsX38       | ex8-11del (NP)  | [Bras et al., 2008]           |
| EX9     | -                         | c.(934-?)_(1083+?)dup               | p.*/p.Y312_G361dup | ex9dup (NP)     | [Kann et al., 2002]           |
| EX10    | -                         | c.(1084-?)_1167+?)del               | p.F339AfsX77       | ex10del (NP)    | [Periquet et al., 2003]       |
| EX10    | -                         | c.(1084-?)_1167+?)dup               | p.*/p.A390FfsX105  | ex10dup (NP)    | [Foroud et al., 2003]         |
| EX10-12 | -                         | c.(1084-?)_(3939+?)del              | p.?                | ex10-12del (NP) | [Shyu et al., 2005]           |
| EX10-12 | -                         | c.(1084-?)_(3939+?)dup              | p.*/p.F362_V466dup | ex10-12dup (NP) | [Macedo et al., 2009]         |
| EX11    | -                         | c.(1168-?)_(1285+?)del              | p.A390EfsX6        | ex11del (NP)    | [Hertz et al., 2006]          |
| EX11    | -                         | c.(1168-?)_(1285+?)dup              | p.*/p.G430LfsX4    | ex11dup (NP)    | [Lucking et al., 2000]        |
| EX12    | -                         | c.(1286-?)_(3939+?)dup              | p.?                | ex12dup (NP)    | [Sun et al., 2006]            |

For all references please visit the Parkinson Disease mutation database PDmutDB (<http://www.molgen.ua.ac.be/PDmutDB>).

<sup>(a)</sup> NG numbering: NG\_008289.1; cDNA numbering: NM\_004562.2; protein numbering: NP\_004553.2. Nucleotide numbering reflects cDNA numbering with +1 corresponding to the A of the ATG translation initiation codon in the reference sequence, according to journal guidelines ([www.hgvs.org/mutnomen](http://www.hgvs.org/mutnomen)). The initiation codon is codon 1.

\* Only observed in control individuals;  
† Also observed in control individuals;  
§ In proximity to exon/intron boundary;  
NP: breakpoints not mapped  
*Italic*: known polymorphism

**Supp. Table S4-1. *PINK1* Classic mutations** <sup>(a)</sup>

(a) Missense, nonsense and frameshift mutations

| Region     | NG Numbering         | cDNA Numbering     | Protein Numbering | Alias            | dbSNP Number | Reference                  |
|------------|----------------------|--------------------|-------------------|------------------|--------------|----------------------------|
| EX1        | g.05164_05195del32   | c.70_101del32      | p.K24GfsX31       | Lys24fs          | -            | [Chaudhary et al., 2006]   |
| EX1        | g.05188G>A           | c.94G>A            | p.G32R            | Gly32Arg         | -            | [Choi et al., 2008]        |
| EX1        | g.05249C>T           | c.155C>T           | p.P52L            | Pro52Leu         | -            | [Brooks et al., 2009]      |
| EX1        | g.05293C>T           | c.199C>T           | p.L67F            | Leu67Phe         | -            | [Marongiu et al., 2008]    |
| EX1        | g.05297_05298GC>CT   | c.203_204G>C       | p.R68P            | Arg68Pro         | -            | [Valente et al., 2004b]    |
| EX1        | g.05327C>T           | c.233C>T           | p.A78V            | Ala78Val         | -            | [Kumazawa et al., 2008]    |
| EX1        | g.05369G>T           | c.275G>T           | p.C92F            | Cys92Phe         | -            | [Valente et al., 2004b]    |
| EX1        | g.05376C>T           | c.282C>T           | p.R98W            | Arg98Trp         | -            | [Marongiu et al., 2008]    |
| EX1        | g.05426T>G           | c.332T>G           | p.I111S           | Ile111Ser        | -            | [Marongiu et al., 2008]    |
| <i>EX1</i> | <i>g.05438A&gt;T</i> | <i>c.344A&gt;T</i> | <i>p.Q115L</i>    | <i>Gln115Leu</i> | -            | [Bonifati et al., 2005]    |
| EX1        | g.05465C>T           | c.371C>T           | p.A124V           | Ala124Val        | -            | [Marongiu et al., 2008]    |
| EX1        | g.05467T>G           | c.373T>G           | p.C125G           | Cys125Gly        | -            | [Ibanez et al., 2006]      |
| EX1        | g.05471A>C           | c.377A>C           | p.Q126P           | Gln126Pro        | -            | [Prestel et al., 2008]     |
| EX2        | g.09434C>T           | c.434C>T           | p.T145M           | Thr145Met        | rs45604240   | [Marongiu et al., 2008]    |
| EX2        | g.09440G>A           | c.440G>A           | p.R147H           | Arg147His        | -            | [Healy et al., 2004]       |
| EX2        | g.09502G>C           | c.502G>C           | p.A168P           | Ala168Pro        | -            | [Valente et al., 2004b]    |
| EX2        | g.09509T>G           | c.509T>G           | p.V170G           | Val170Gly        | -            | [Toft et al., 2007]        |
| EX2        | g.09558G>C           | c.558G>C           | p.K186N           | Lys186Asn        | -            | [Djarmati et al., 2006]    |
| EX2        | g.09577G>A           | c.577G>A           | p.G193R           | Gly193Arg        | -            | [Weng et al., 2007]        |
| EX2        | g.09587delC          | c.587delC          | p.P196QfsX25      | Pro196fs         | -            | [Kumazawa et al., 2008]    |
| EX2        | g.09587C>T           | c.587C>T           | p.P196L           | Pro196Leu        | rs35802484   | [Bonifati et al., 2005]    |
| EX2        | g.09625C>G           | c.625C>G           | p.P209A           | Pro209Ala        | rs17852513   | [Lee et al., 2009]         |
| EX2        | g.09626C>T           | c.626C>T           | p.P209L           | Pro209Leu        | rs34677717   | [Djarmati et al., 2006]    |
| EX2        | g.09650C>A           | c.650C>A           | p.A217D           | Ala217Asp        | -            | [Leutenegger et al., 2006] |
| EX3        | g.11454A>G           | c.692A>G           | p.E231G           | Glu231Gly        | -            | [Djarmati et al., 2006]    |
| EX3        | g.11466A>T           | c.704A>T           | p.N235I*          | Asn235Ile        | -            | [Djarmati et al., 2006]    |

|     |             |           |              |            |            |                             |
|-----|-------------|-----------|--------------|------------|------------|-----------------------------|
| EX3 | g.11471A>G  | c.709A>G  | p.M237V†     | Met237Val  | -          | [Macedo et al., 2009]       |
| EX3 | g.11477C>T  | c.715C>T  | p.Q239X      | Glu239Stop | -          | [Hatano et al., 2004]       |
| EX3 | g.11480G>A  | c.718G>A  | p.E240K      | Glu240Lys  | -          | [Rogaeva et al., 2004]      |
| EX3 | g.11498C>T  | c.736C>T  | p.R246X      | Arg246Stop | -          | [Hatano et al., 2004]       |
| EX3 | g.11493C>G  | c.731C>G  | p.A244G      | Ala244Gly  | -          | [Gelmetti et al., 2008]     |
| EX3 | g.11532C>T  | c.770C>T  | p.T257I      | Thr257Ile  | -          | [Marongiu et al., 2008]     |
| EX3 | g.11536C>A  | c.774C>A  | p.Y258X      | Tyr258Stop | -          | [Tan et al., 2006b]         |
| EX4 | g.16046A>G  | c.787A>G  | p.R263G*     | Arg263Gly  | -          | [Rogaeva et al., 2004]      |
| EX4 | g.16061C>G  | c.802C>G  | p.L268V      | Leu268Val  | -          | [Tan et al., 2005]          |
| EX4 | g.16072C>A  | c.813C>A  | p.H271Q      | His271Gln  | rs28940284 | [Hatano et al., 2004]       |
| EX4 | g.16086G>A  | c.827G>A  | p.R276Q      | Arg276Gln  | -          | [Marongiu et al., 2008]     |
| EX4 | g.16095G>A  | c.836G>A  | p.R279H      | Arg279His  | rs61735932 | [Klein et al., 2005]        |
| EX4 | g.16097G>A  | c.838G>A  | p.A280T      | Ala280Thr  | -          | [Tan et al., 2006b]         |
| EX4 | g.16146C>T  | c.887C>T  | p.P296L*     | Pro296Leu  | -          | [Valente et al., 2004b]     |
| EX4 | g.16148delG | c.889delG | p.D297MfsX22 | Asp297fs   | -          | [Kumazawa et al., 2008]     |
| EX4 | g.16173C>T  | c.914C>T  | p.P305L      | Pro305Leu  | rs7349186  | [Healy et al., 2004]        |
| EX4 | g.16185G>A  | c.926G>A  | p.G309D      | Gly309Asp  | -          | [Valente et al., 2004a]     |
| EX4 | g.16197C>T  | c.938C>T  | p.T313M      | Thr313Met  | -          | [Chishti et al., 2006]      |
| EX4 | g.16208G>A  | c.949G>A  | p.V371I      | Val317Ile  | -          | [Abou-Sleiman et al., 2006] |
| EX4 | g.16211A>T  | c.952A>T  | p.M318L      | Met318Leu  | -          | [Rogaeva et al., 2004]      |
| EX5 | g.17111C>T  | c.965C>T  | p.P322L      | Pro322Leu  | -          | [Marongiu et al., 2008]     |
| EX5 | g.17161G>A  | c.1015G>A | p.A339T      | Ala339Thr  | rs55831733 | [Rogaeva et al., 2004]      |
| EX5 | g.17164G>A  | c.1018G>A | p.A340T      | Ala340Thr  | rs3738136  | [Valente et al., 2004a]     |
| EX5 | g.17169G>A  | c.1023G>A | p.M341I      | Met341Ile  | rs35813094 | [Lee et al., 2009]          |
| EX5 | g.17170A>G  | c.1024A>G | p.M342V      | Met342Val  | -          | [Kumazawa et al., 2008]     |
| EX5 | g.17172G>A  | c.1026G>A | p.M342I      | Met342Ile  | -          | [Nuytemans et al., 2009]    |
| EX5 | g.17186T>C  | c.1040T>C | p.L347P†     | Leu347Pro  | rs28940285 | [Hatano et al., 2004]       |
| EX5 | g.17230G>C  | c.1084G>C | p.D362H*     | Asp362His  | -          | [Rogaeva et al., 2004]      |
| EX5 | g.17246A>G  | c.1100A>G | p.N367S      | Asn367Ser  | -          | [Choi et al., 2008]         |
| EX5 | g.17252T>C  | c.1106T>C | p.L369P      | Leu369Pro  | -          | [Ibanez et al., 2006]       |
| EX6 | g.20074G>A  | c.1147G>A | p.A383T      | Ala383Thr  | rs45515602 | [Abou-Sleiman et al., 2006] |
| EX6 | g.20080T>C  | c.1153T>C | p.F385L      | Phe385Leu  | -          | [Choi et al., 2008]         |
| EX6 | g.20084G>C  | c.1157G>C | p.G386A      | Gly386Ala  | -          | [Ibanez et al., 2006]       |
| EX6 | g.20089T>C  | c.1162T>C | p.C388R      | Cys388Arg  | -          | [Li et al., 2005b]          |
| EX6 | g.20111G>T  | c.1184G>T | p.G395V      | Gly395Val  | -          | [Marongiu et al., 2008]     |
| EX6 | g.20123C>T  | c.1196C>T | p.P399L      | Pro399Leu  | -          | [Tang et al., 2006]         |
| EX6 | g.20147G>A  | c.1220G>A | p.R407Q      | Arg407Gln  | -          | [Fung et al., 2006a]        |
| EX6 | g.20153G>T  | c.1226G>T | p.G409V      | Gly409Val  | -          | [Ibanez et al., 2006]       |
| EX6 | g.20158G>A  | c.1231G>A | p.G411S      | Gly411Ser  | rs45478900 | [Abou-Sleiman et al., 2006] |

|     |                      |                      |                 |                            |            |                             |
|-----|----------------------|----------------------|-----------------|----------------------------|------------|-----------------------------|
| EX6 | g.20174C>G           | c.1247C>G            | p.P416R         | Pro416Arg                  | -          | [Myhre et al., 2008a]       |
| EX6 | g.20177A>G           | c.1250A>G            | p.E417G         | Glu417Gly                  | -          | [Hatano et al., 2004]       |
| EX7 | g.20539_20561del23   | c.(1252-2)_1274del23 | p.?             | 23bp del acceptor site ex7 | -          | [Marongiu et al., 2007]     |
| EX7 | g.20544T>C           | c.1255T>C            | p.S419P         | Ser419Pro                  | -          | [Myhre et al., 2008a]       |
| EX7 | g.20569C>A           | c.1280C>A            | p.A427E         | Ala427Glu                  | -          | [Brooks et al., 2009]       |
| EX7 | g.20562C>T           | c.1273C>T            | p.P425S         | Pro425Ser                  | -          | [Rogaeva et al., 2004]      |
| EX7 | g.20580T>C           | c.1291T>C            | p.Y431H         | Tyr431His                  | -          | [Abou-Sleiman et al., 2006] |
| EX7 | g.20598T>C           | c.1309T>C            | p.W437R         | Trp437Arg                  | -          | [Kumazawa et al., 2008]     |
| EX7 | g.20600G>A           | c.1311G>A            | p.W437X†        | Trp437Stop                 | -          | [Valente et al., 2004a]     |
| EX7 | g.20614T>C           | c.1325T>C            | p.I442T         | Ile442Thr                  | -          | [Valente et al., 2004b]     |
| EX7 | g.20641A>G           | c.1352A>G            | p.N451S         | Asn451Ser                  | -          | [Abou-Sleiman et al., 2006] |
| EX7 | g.20655C>T           | c.1366C>T            | p.Q456X         | Gln456Stop                 | rs45539432 | [Bonifati et al., 2005]     |
| EX7 | g.20671T>G           | c.1382T>G            | p.L461R*        | Leu461Arg                  | -          | [Abou-Sleiman et al., 2006] |
| EX7 | g.20680G>A           | c.1391G>A            | p.R464H         | Arg464His                  | -          | [Valente et al., 2004b]     |
| EX7 | g.20715G>A           | c.1426G>A            | p.E476K†        | Glu476Lys                  | -          | [Myhre et al., 2008a]       |
| EX7 | g.20733G>A           | c.1444G>A            | p.V482M         | Val482Met                  | -          | [Kumazawa et al., 2008]     |
| EX7 | g.20755T>C           | c.1466T>C            | p.L489P         | Leu489Pro                  | -          | [Rogaeva et al., 2004]      |
| EX7 | g.20763C>T           | c.1474C>T            | p.R492X         | Arg492Stop                 | rs34208370 | [Hatano et al., 2004]       |
| EX8 | g.21984C>T           | c.1493C>T            | p.P498L         | Pro498Leu                  | -          | [Toft et al., 2007]         |
| EX8 | g.21993G>A           | c.1502G>A            | p.R501Q*        | Arg501Gln                  | -          | [Abou-Sleiman et al., 2006] |
| EX8 | g.22048delG          | c.1557delG           | p.K520RfsX3     | Leu519fs                   | -          | [Ibanez et al., 2006]       |
| EX8 | g.22053A>C           | c.1562A>C            | p.N521T         | Asn521Thr                  | rs1043424  | [Myhre et al., 2008a]       |
| EX8 | g.22064G>A           | c.1573G>A            | p.D525N†        | Asp525Asn                  | -          | [Valente et al., 2004b]     |
| EX8 | g.22064_22065insTTAG | c.1473_1574insTTAG   | p.D525VfsX38    | Asp525fs                   | -          | [Rohe et al., 2004]         |
| EX8 | g.22093_22094insCAA  | c.1602_1603insCAA    | p.Q534_S535insQ | 534_535insQ                | -          | [Klein et al., 2005]        |
| EX8 | g.22100G>A           | c.1609G>A            | p.A537T         | Ala537Thr                  | -          | [Marongiu et al., 2008]     |
| EX8 | g.22116A>G           | c.1625A>G            | p.N542S         | Asn542Ser                  | -          | [Kumazawa et al., 2008]     |
| EX8 | g.22138_22141delTGTG | c.1647_1650delTGTG   | p.C549WfsX5     | Cys549fs                   | -          | [Ibanez et al., 2006]       |
| EX8 | g.22214T>C           | c.1723T>C            | p.C575R         | Cys575Arg                  | -          | [Abou-Sleiman et al., 2006] |
| EX8 | g.22236G>T           | c.1745G>T            | p.X582L†        | Stop582Leu                 | -          | [Toft et al., 2007]         |

## (b) Splice, silent and UTR variants

| Region | NG Numbering | cDNA Numbering | Protein Numbering | Alias     | dbSNP Number | Reference               |
|--------|--------------|----------------|-------------------|-----------|--------------|-------------------------|
| 5'UTR  | g.05013G>A   | c.-82G>A       | p.? *             | c.-82G>A  | -            | [Bonifati et al., 2005] |
| 5'UTR  | g.05074G>A   | c.-21G>A       | p.?               | c.-21G>A  | -            | [Klein et al., 2005]    |
| 5'UTR  | g.05075C>T   | c.-20C>T       | p.? *             | c.-20C>T  | -            | [Bonifati et al., 2005] |
| EX1    | g.05283C>T   | c.189C>T       | p.L63             | Leu63     | rs45530340   | [Valente et al., 2004b] |
| IVS1   | g.09381A>G   | -              | p.?               | IVS1-7A>G | rs2298298    | [Valente et al., 2004a] |
| EX3    | g.11470A>C   | c.708A>C       | p.T236            | Thr236    | -            | [Rogaeva et al., 2004]  |

|             |                      |           |         |                      |                  |                               |
|-------------|----------------------|-----------|---------|----------------------|------------------|-------------------------------|
| EX4         | g.16063A>G           | c.804A>G  | p.L268  | Leu268               | -                | [Weng et al., 2007]           |
| EX4         | g.16096C>T           | c.837C>T  | p.R279  | Arg279               | -                | [Toft et al., 2007]           |
| EX4         | g.16111C>T           | c.852C>T  | p.S284* | Ser284               | -                | [Bonifati et al., 2005]       |
| EX4         | g.16138C>A           | c.879C>A  | p.V293  | Val293               | -                | [Godeiro-Junior et al., 2009] |
| EX4         | g.16147T>G           | c.888T>G  | p.P296  | Pro296               | -                | [Rogaeva et al., 2004]        |
| EX4         | g.16195G>A           | c.936G>A  | p.R312  | Arg312               | rs56200357       | [Valente et al., 2004a]       |
| EX4         | g.16207C>T           | c.948C>T  | p.L316  | Leu316               | -                | [Rogaeva et al., 2004]        |
| <i>IVS4</i> | <i>g.17101G&gt;A</i> | -         | p.?     | <i>IVS4-5G&gt;A</i>  | <i>rs3131713</i> | [Valente et al., 2004a]       |
| EX5         | g.17211A>G           | c.1065A>G | p.Q355  | Gln355               | -                | [Valente et al., 2004b]       |
| EX5         | g.17241C>T           | c.1095C>T | p.S365  | Ser365               | -                | [Valente et al., 2004b]       |
| EX6         | g.20100T>C           | c.1173T>C | p.D391† | Asp391               | rs45499398       | [Myhre et al., 2008a]         |
| EX6         | g.20139C>T           | c.1212C>T | p.Y404  | Tyr404               | -                | [Weng et al., 2007]           |
| EX          | g.20157C>T           | c.1230C>T | p.N410  | Asn410               | -                | [Godeiro-Junior et al., 2009] |
| EX7         | g.20549G>A           | c.1260G>A | p.T420  | Thr420               | -                | [Brooks et al., 2009]         |
| EX7         | g.20651C>T           | c.1362C>T | p.Y454  | Tyr454               | rs56383368       | [Weng et al., 2007]           |
| <i>IVS7</i> | <i>g.20791C&gt;G</i> | -         | p.?     | <i>IVS7+14C&gt;G</i> | -                | [Valente et al., 2004b]       |
| EX8         | g.22219A>G           | c.1728A>G | p.S576* | Ser576               | -                | [Rogaeva et al., 2004]        |
| 3'UTR       | g.22274T>A           | c.*37T>A  | p.?     | c.*37T>A             | rs686658         | [Rogaeva et al., 2004]        |
| 3'UTR       | g.22277G>A           | c.*40G>A  | p.?     | c.*40G>A             | -                | [Rogaeva et al., 2004]        |

**Supp. Table S4-2. *PINK1* Copy number variations**<sup>(a)</sup>

| Region        | NG Numbering | cDNA Numbering         | Protein Numbering | Alias         | Reference                |
|---------------|--------------|------------------------|-------------------|---------------|--------------------------|
| Complete gene | -            | c.(?-94)_(*2566_?)del  | Complete protein  | delPINK1 (NP) | [Marongiu et al., 2007]  |
| EX4-8         | -            | c.(777-?)_(2566+?)del  | p.?               | ex4-8del (NP) | [Cazeneuve et al., 2009] |
| EX6-8         | -            | c.(1124-?)_(2566+?)del | p.?               | ex6-8del (NP) | [Li et al., 2005b]       |
| EX7           | -            | c.(1252-?)_(1488+?)del | p.V418_K496del    | ex7del (NP)   | [Camargos et al., 2009]  |

For all references please visit the Parkinson Disease mutation database PDmutDB (<http://www.molgen.ua.ac.be/PDmutDB>).

<sup>(a)</sup> NG numbering: NG\_008164.1; cDNA numbering: NM\_032409.2, protein numbering: NP\_115785.1. Nucleotide numbering reflects cDNA numbering with +1 corresponding to the A of the ATG translation initiation codon in the reference sequence, according to journal guidelines ([www.hgvs.org/mutnomen](http://www.hgvs.org/mutnomen)). The initiation codon is codon 1.

\* Only observed in control individuals;

† Also observed in control individuals;

§ In proximity to exon/intron boundary;

NP: breakpoints not mapped

*Italic*: known polymorphism

**Supp. Table S5-1. PARK7 Classic mutations** <sup>(a)</sup>

| (a) Missense, nonsense and frameshift mutations |                     |                 |                   |              |              |                             |
|-------------------------------------------------|---------------------|-----------------|-------------------|--------------|--------------|-----------------------------|
| Region                                          | NG Numbering        | cDNA Numbering  | Protein Numbering | Alias        | dbSNP Number | Reference                   |
| EX2                                             | g.06161T>C          | c.29T>C         | p.L10P            | Leu10Pro     | -            | [Guo et al., 2008]          |
| EX2                                             | g.06210G>A          | c.78G>A         | p.M26I            | Met26Ile     | -            | [Abou-Sleiman et al., 2003] |
| EX3                                             | g.08695G>T          | c.115G>T        | p.A39S            | Ala39Ser     | -            | [Tang et al., 2006]         |
| EX3                                             | g.08772G>C          | c.192G>C        | p.E64D§           | Glu64Asp     | -            | [Hering et al., 2004]       |
| EX5                                             | g.14281G>A          | c.293G>A        | p.R98Q            | Arg98Gln     | rs71653619   | [Abou-Sleiman et al., 2003] |
| EX5                                             | g.14298G>A          | c.310G>A        | p.A104T§          | Ala104Thr    | -            | [Clark et al., 2004]        |
| EX7                                             | g.28277A>C          | c.446A>C        | p.D149A           | Asp149Ala    | -            | [Abou-Sleiman et al., 2003] |
| EX7                                             | g.28302_28304delGCC | c.471_473delGCC | p.P158del         | Pro158del    | -            | [Macedo et al., 2009]       |
| EX7                                             | g.28318G>A          | c.487G>A        | p.E163K           | Glu163Lys    | -            | [Annesi et al., 2005]       |
| EX7                                             | g.28328T>C          | c.497T>C        | p.L166P           | Leu166Pro    | rs28938172   | [Bonifati et al., 2003]     |
| EX7                                             | g.28342G>T          | c.511G>T        | p.A171S*          | Ala171Ser    | -            | [Clark et al., 2004]        |
| EX7                                             | g.28354A>G          | c.523A>G        | p.K175E           | Lys175Glu    | -            | [Nuytemans et al., 2009]    |
| EX7                                             | g.28366G>A          | c.535G>A        | p.A179T           | Ala179Thr    | rs71653622   | [Nuytemans et al., 2009]    |
| (b) Splice, silent and UTR variants             |                     |                 |                   |              |              |                             |
| Region                                          | NG Numbering        | cDNA Numbering  | Protein Numbering | Alias        | dbSNP Number | Reference                   |
| EX4                                             | g.12733C>T          | c.234C>T        | p.G78             | Gly78        | rs11548937   | [Abou-Sleiman et al., 2003] |
| IVS4                                            | g.12759_12760insA   | -               | p.?               | IVS4+8_9insA | -            | [Tarantino et al., 2009]    |
| EX5                                             | g.14282G>A          | c.294G>A        | p.R98             | Arg98        | -            | [Abou-Sleiman et al., 2003] |
| IVS5                                            | g.14312_14322del11  | -               | p.?               | IVS5+2_12del | -            | [Hedrich et al., 2004a]     |
| EX7                                             | g.28311C>A          | c.480C>A        | p.T160            | Thr160       | -            | [Pankratz et al., 2006b]    |
| EX7                                             | g.28332A>G          | c.501A>G        | p.A167            | Ala167       | rs71653621   | [Abou-Sleiman et al., 2003] |
| EX7                                             | g.28389T>C          | c.558T>C        | p.V186            | Val186       | -            | [Hering et al., 2004]       |
| EX7                                             | g.28521_28522insA   | c.690_691insA   | p.?               | c.*120insA   | -            | [Abou-Sleiman et al., 2003] |
| EX7                                             | g.28604G>A          | c.773G>A        | p.?               | c.*203G>A    | -            | [Abou-Sleiman et al., 2003] |

**Supp. Table S5-2. PARK7 Copy number variations** <sup>(a)</sup>

| Region | NG Numbering          | cDNA Numbering       | Protein Numbering | Alias         | Reference               |
|--------|-----------------------|----------------------|-------------------|---------------|-------------------------|
| EX1-5  | g.02064_16161del14098 | c.1_322del           | p.?†              | ex1-5del      | [Bonifati et al., 2003] |
| EX1-5  | -                     | c.(-129-?)(322+?)dup | p.?               | ex1-5dup (NP) | [Macedo et al., 2009]   |
| EX5    | -                     | c.(253-?)(107+?)del  | p.S85VfsX10       | ex5del (NP)   | [Djarmati et al., 2004] |
| EX5-7  | -                     | c.(253-?)(795+?)del  | p.?               | ex5-7del (NP) | [Hedrich et al., 2004a] |

For all references please visit the Parkinson Disease mutation database PDmutDB (<http://www.molgen.ua.ac.be/PDmutDB>).

<sup>(a)</sup> NG numbering: NG\_008271.1; cDNA numbering: NM\_007262.4; protein numbering: NP\_009193.2. Nucleotide numbering reflects cDNA numbering with +1 corresponding to the A of the ATG translation initiation codon in the reference sequence, according to journal guidelines ([www.hgvs.org/mutnomen](http://www.hgvs.org/mutnomen)). The initiation codon is codon 1.

\* Only observed in control individuals;

† Also observed in control individuals;

§ In proximity to exon/intron boundary;

NP: breakpoints not mapped

*Italic*: known polymorphism
